# Supplementary material for: Reversal of splicing infidelity is a pre-activation step in B cell differentiation
Source: PubMed Central journal article supplement (PMC9806119; doi:10.3389/fimmu.2022.1060114), 2022-12-19
Supplement: DataSheet_1.pdf [file DataSheet_1.pdf]

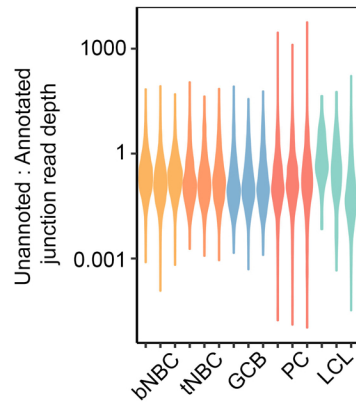

**Figure S1. Unannotated splicing occurs at a range of depths compared to annotated splicing.** Ratios of the number of reads uniquely aligning to unannotated splice junctions to the number of reads uniquely aligning to annotated splice junctions that share their donors or acceptors. In the case of more than one annotated splice junction sharing donor/acceptor sites with the unannotated junction, the annotated splice junction with the highest read depth is used. bNBC = blood naïve B cells, tNBC = tonsil naïve B cells, GCB = germinal center B cells, PC = plasma cells, LCL = lymphoblastoid cell line

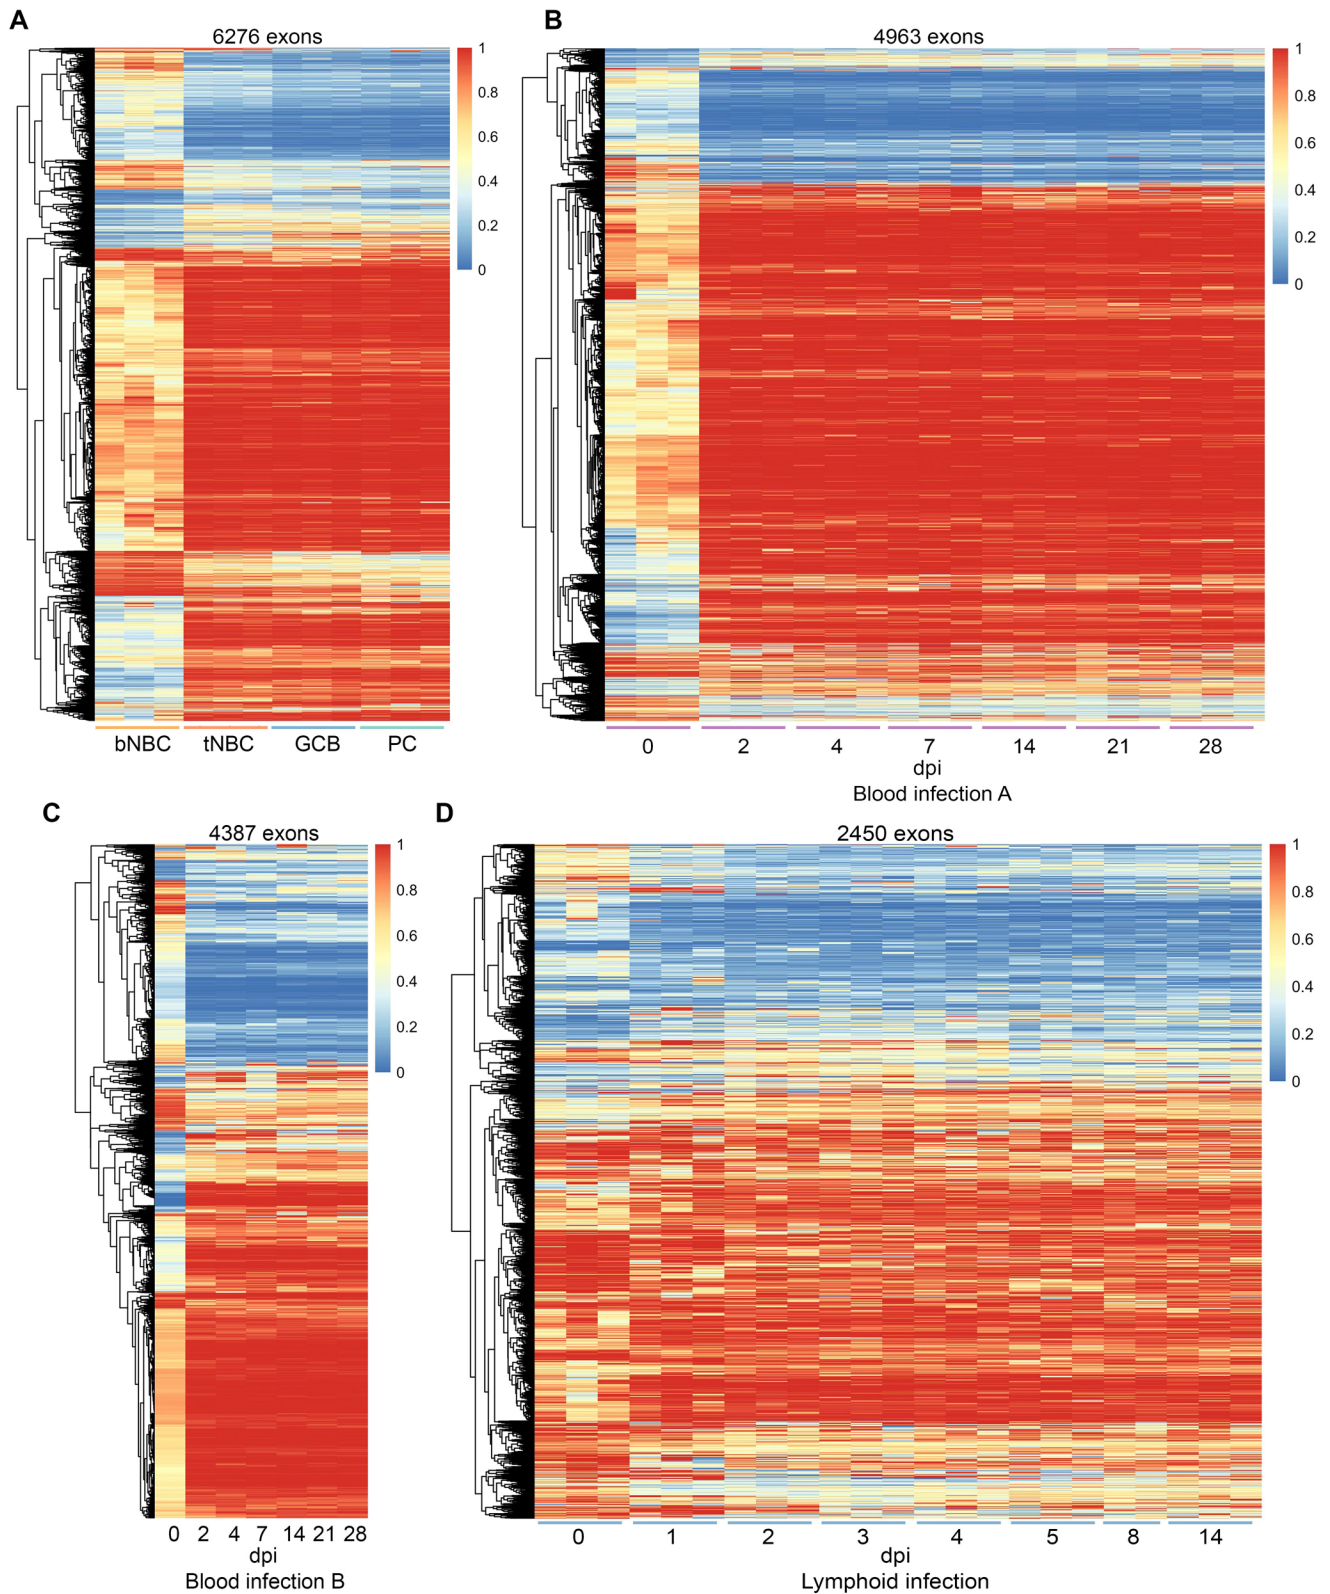

**Figure S2. Exon usage changes occur early in differentiation/infection and do not revert.** (A) Exon inclusion level (rMATS IncLevel) for exons in genes with TPM > 10 showing a high-confidence usage change (rMATS FDR < 0.0005,  $|\text{IncLevelDifference}| \geq 0.2$ ) in lymphoid (tonsil) naïve blood cells (tNBC), GC B cells (GCB) or plasma cells (PC) compared to blood naïve B cells (bNBC). N = 3 donors per subset. (B-C) Exon inclusion level (rMATS IncLevel) for exons in genes with TPM > 10 showing a high-confidence usage change (rMATS FDR < 0.0005,  $|\text{IncLevelDifference}| \geq 0.2$ ) in any timepoint compared to 0 dpi for (B) EBV infection of blood B cells timecourse A, N = 3 replicates, (C) EBV infection of blood B cells timecourse B, N = 1 replicate, and (D) EBV infection of lymphoid (adenoid) NBCs, N = 3 replicates.

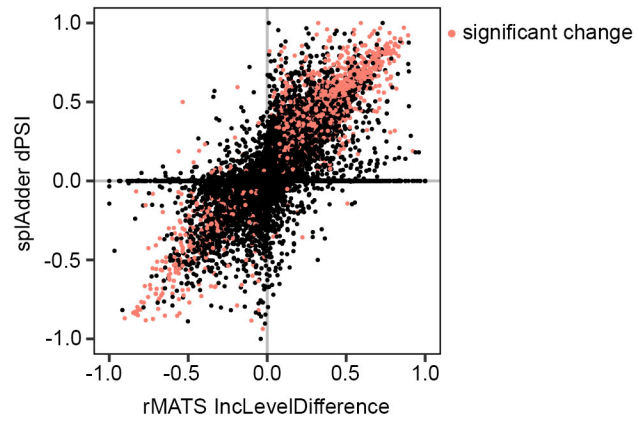

**Figure S3. Exon usage changes detected by rMATS or splAdder.** IncLevelDifference (exon inclusion level difference) determined by rMATS and exon dPSI (difference in Percent Spliced In) determined by splAdder for plasma cells (PC) compared to blood naïve B cells (bNBC). Points indicate exon-skipping splice junctions. Red points indicate exon-skipping splice junctions with significant (FDR < 0.05) changes in exon inclusion level reported by both algorithms.

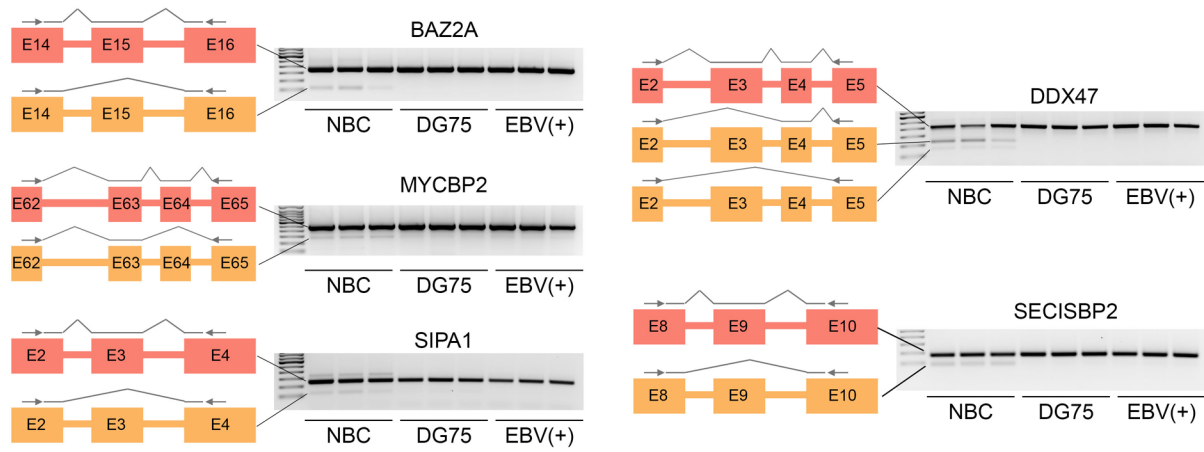

**Figure S4. RT-PCR detection of exon usage changes.** Transcript diagrams and RT-PCR gels showing skipped exons in transcripts of BAZ2A, DDX47, MYCBP2, SECISBP2 and SIPA1 in naïve B cells from 3 donors but not in differentiated B cell lines DG75 (EBV-negative) or Akata (EBV-positive). Arrows in diagrams indicate primer positions.

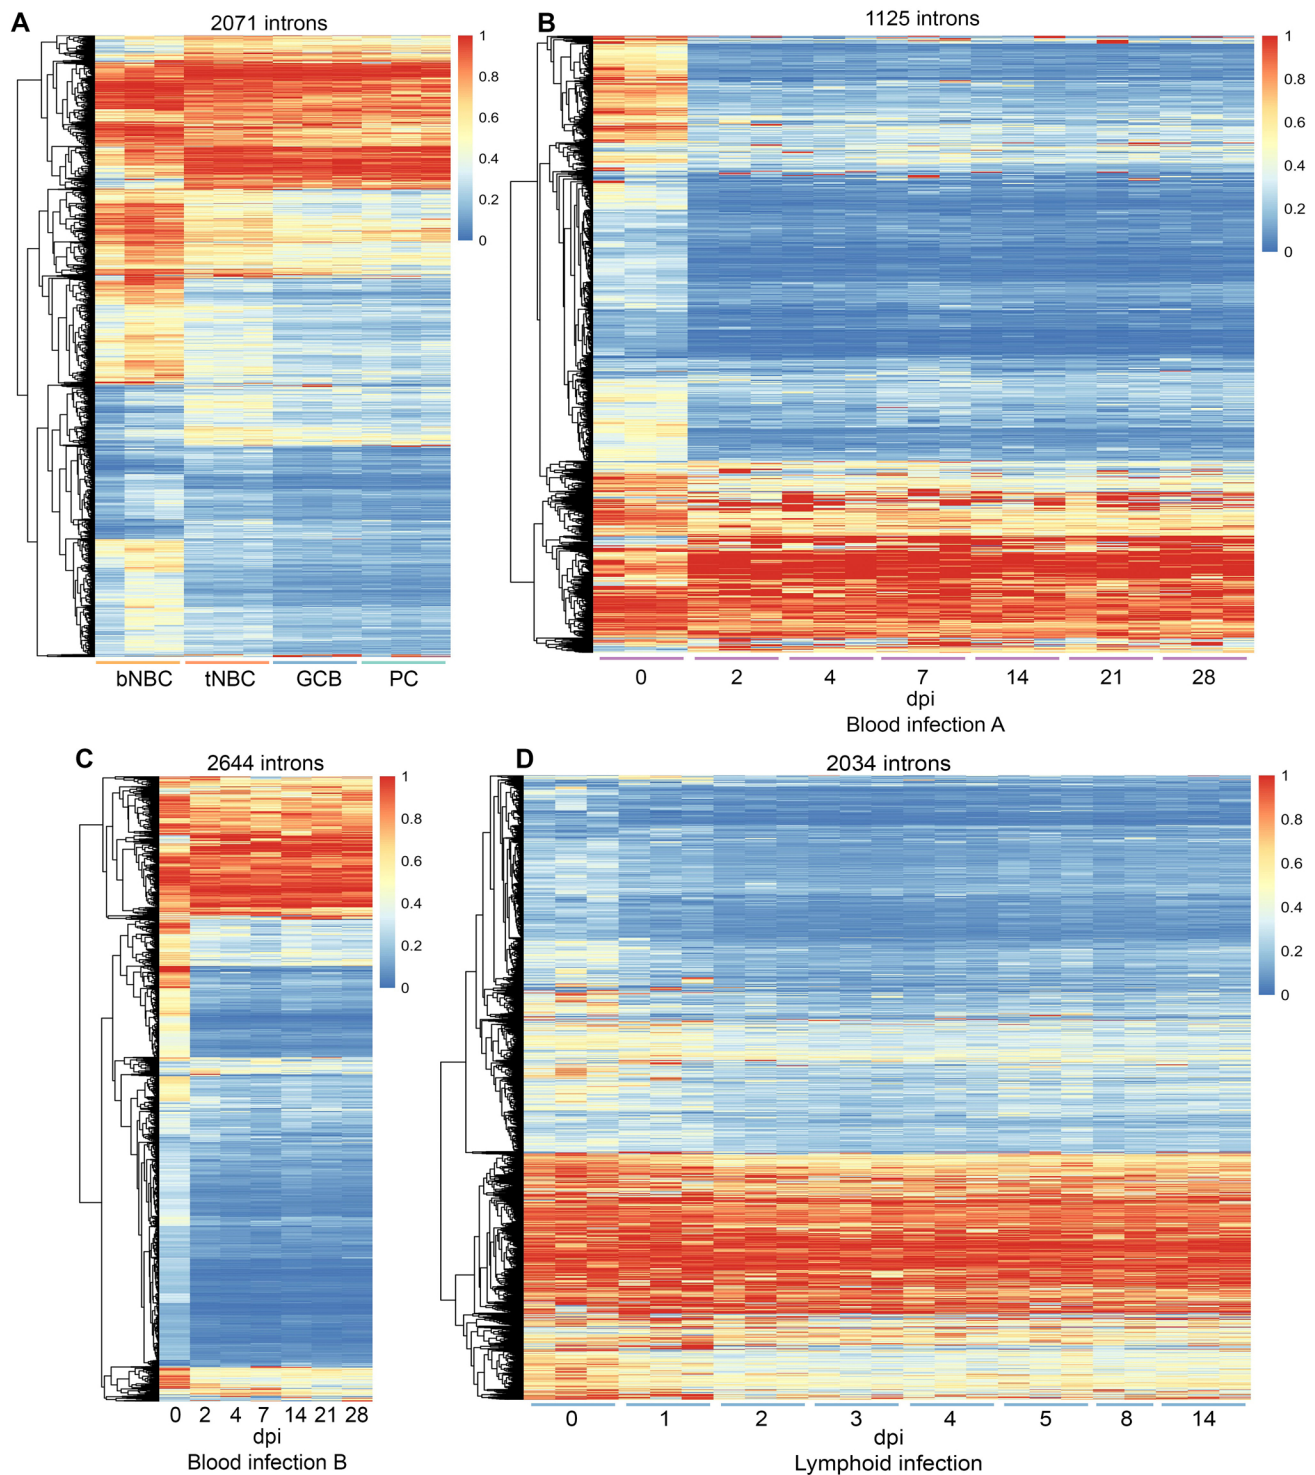

**Figure S5. Intron usage changes in differentiation/infection** (A) Intron retention level (rMATS IncLevel) for introns in genes with TPM > 10 showing a change in retention (rMATS FDR < 0.05, |IncLevelDifference| ≥ 0.1) in lymphoid (tonsil) NBCs (tNBC), GC B cells (GCB) or plasma cells (PC) compared to blood NBCs (bNBC). N = 3 donors per subset. (B-D) Intron retention level (rMATS IncLevel) for introns in genes with TPM > 10 showing a change in retention (rMATS FDR < 0.05, |IncLevelDifference| ≥ 0.1) in any timepoint compared to 0 dpi for (B) EBV infection of blood B cells timecourse A, N = 3 replicates, (C) EBV infection of blood B cells timecourse B, N = 1 replicate, and (D) EBV infection of lymphoid (adenoid) NBCs, N = 3 replicates. Hierarchical clustering was performed and heatmaps generated using pheatmap.

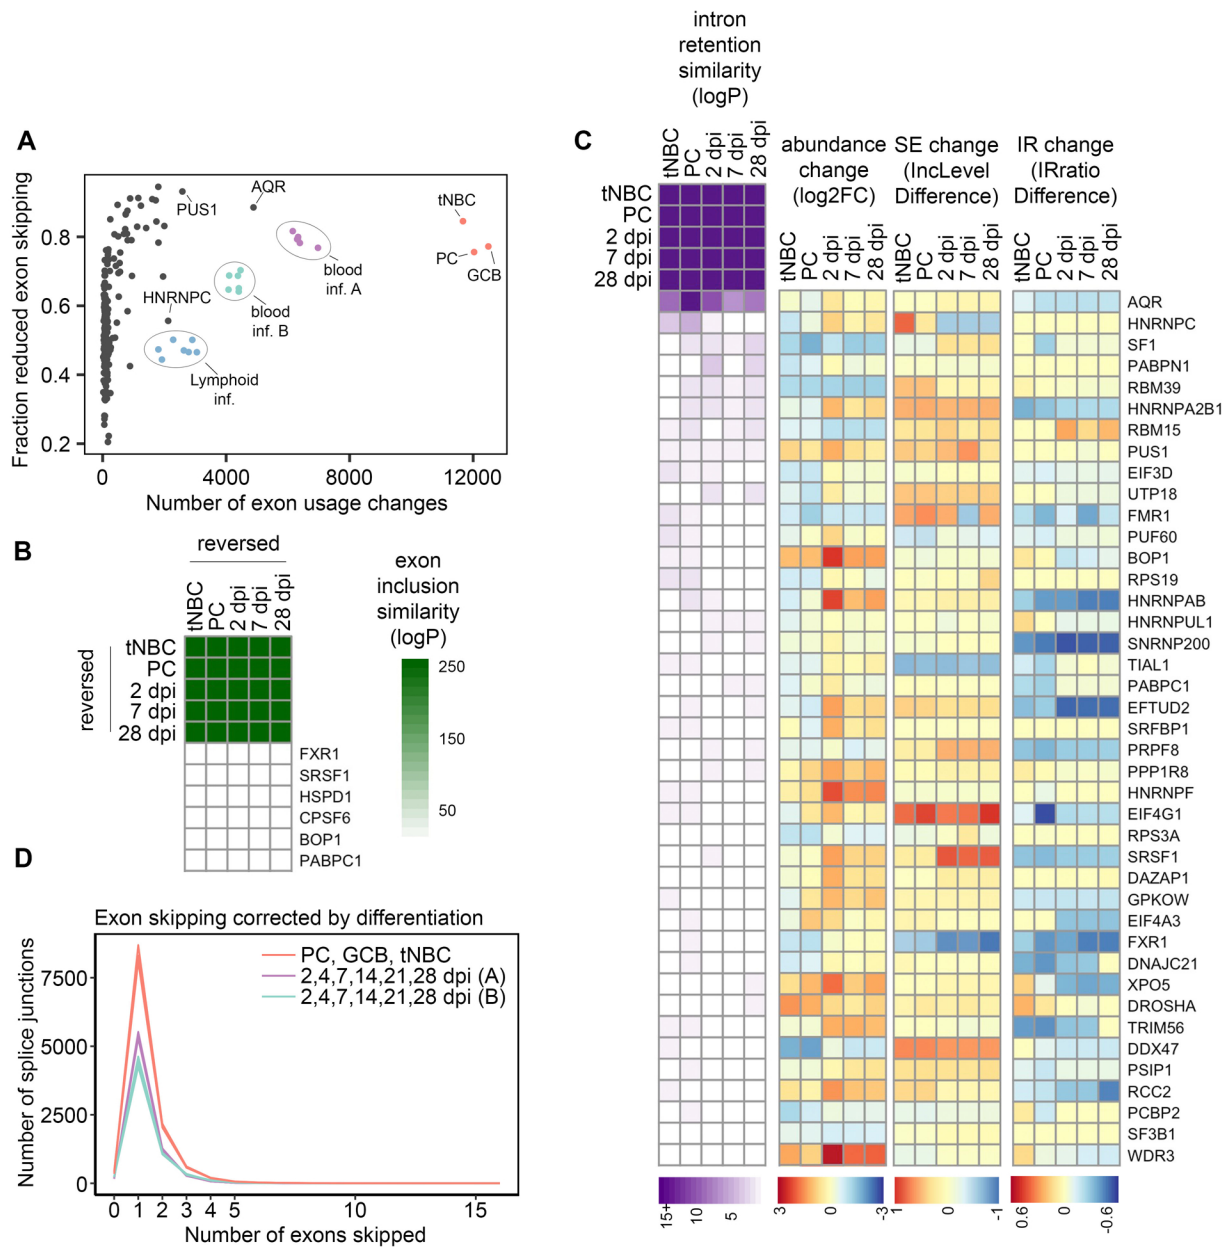

**Figure S6. Increased splicing program efficiency alters the splicing profile.** (A) Exon usage changes in differentiating B cells compared to blood NBCs (3 replicates per subset,  $\sim 100 \times 10^6$  reads per replicate), EBV-infected cells compared to uninfected cells (Blood A: 6 timepoints, 3 replicates per timepoint,  $13\text{--}85 \times 10^6$  reads per replicate; Blood B: 6 timepoints, 1 replicate per timepoint,  $\sim 60 \times 10^6$  reads per replicate; Lymphoid: 7 timepoints, 3 replicates per timepoint,  $120\text{--}165 \times 10^6$  reads per replicate), and siRNA knockdowns of 182 RBPs compared to control K562 cells (2 replicates per RBP,  $25\text{--}30 \times 10^6$  reads per replicate). (B) Heatmap indicating exon inclusion similarity for RBPs with exon inclusion changes most similar to the artificially reversed values for B cell differentiation/EBV infection. (C) Heatmaps indicating intron retention decrease similarity ( $\log P = -\log(\text{p-value})$  by hypergeometric test), abundance change ( $\log_2\text{FC} = \log_2(\text{fold change})$  by sleuth), skipped exon (SE) change ( $\text{IncLevelDifference} = \text{inclusion level difference by rMATS}$ ), and intron retention (IR) change ( $\text{IRratio Difference} = \text{intron retention ratio difference by IRFinder}$ ) for RBPs with intron retention changes most similar to those of B cell differentiation/EBV infection. For RBP genes with multiple splice junctions the SE and IR events with the highest absolute inclusion/retention difference measurable in all compared replicates are displayed. PC = PCs compared to blood NBCs; tNBC = tonsil NBCs compared to blood NBCs; 2, 7 and 28 dpi = EBV-infected cells at specified timepoints compared to uninfected cells in Blood timecourse A. (D) Number of exons skipped by exon-skipping splice junctions that are corrected by differentiation or EBV infection ( $\text{rMATS FDR} < 0.05$ ). B cell subset comparisons include 3 subsets (tonsil NBCs, GC B cells, and PCs) compared to blood NBCs. Each B cell subset includes 3 replicates. Blood infection timecourse A (purple) includes 6 timepoint comparisons to 0 dpi with 3 replicates each, Blood infection timecourse B (green) includes 6 timepoint comparisons to 0 dpi with 1 replicate each.

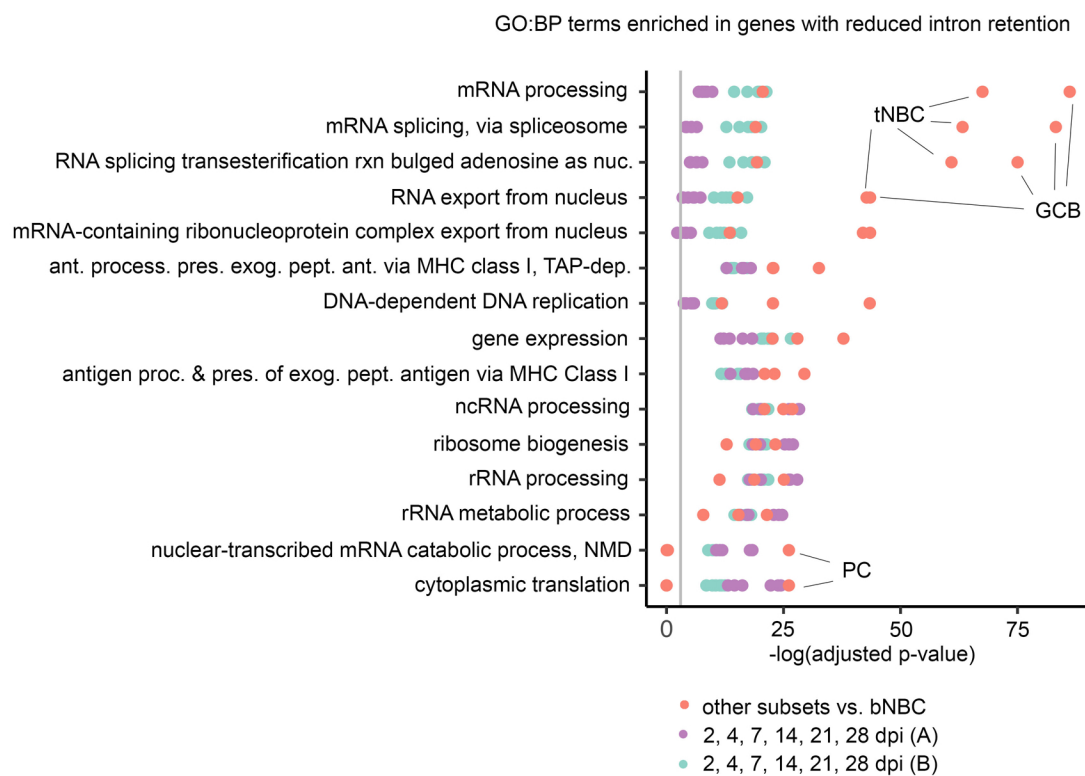

**Figure S7. Functions of genes with a loss of intron retention.** GO Biological Process term enrichment in genes with reduced intron retention in differentiating or EBV-infected cells. Top 5 terms with the lowest adjusted p-value for each experiment/timepoint are shown. Complete enrichment information available in Supplemental file 8. Vertical grey line indicates adjusted p-value = 0.05. Adjusted p-values calculated by Enrichr using Fisher's exact test with Benjamini-Hochberg correction.

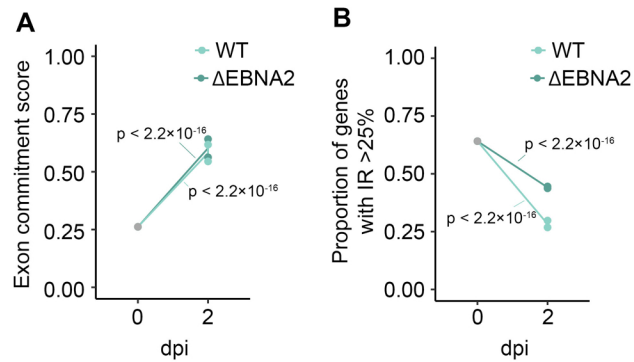

**Figure S8. EBV EBNA2 has minimal effects on exon usage changes.** (A) Exon commitment score for blood NBCs infected with wild-type (WT) EBV or EBV with deleted EBNA2 gene ( $\Delta$ EBNA2). Exon commitment score = proportion of exons either fully included (rMATS IncLevel > 0.99) or fully excluded (rMATS IncLevel < 0.01) in genes with TPM > 10. P-values calculated relative to uninfected cells using 2-sample tests for equality of proportions with continuity correction. 0 dpi = 1 replicate, 2 dpi = 2 replicates. (B) Proportion of genes containing introns with high retention levels (IRFinder IRratio > 0.25) for blood NBCs infected with wild-type (WT) EBV or EBV with deleted EBNA2 gene ( $\Delta$ EBNA2). P-values calculated using 2-sample tests for equality of proportions with continuity correction. 0 dpi = 1 replicate, 2 dpi = 2 replicates.
